# Supplementary material for: The fungal root endophyte Serendipita vermifera displays inter-kingdom synergistic beneficial effects with the microbiota in Arabidopsis thaliana and barley
Source: PubMed Central journal article supplement (PMC8857181; doi:10.1038/s41396-021-01138-y), 2021-10-22
Supplement: 41396_2021_1138_MOESM2_ESM.pdf [file 41396_2021_1138_MOESM2_ESM.pdf]

Table S1: List of primers used for qRT-PCR in this study

| <b>Name</b>                                   | <b>Sequence (5' → 3')</b>                        | <b>Gene ID / Reference</b>           |
|-----------------------------------------------|--------------------------------------------------|--------------------------------------|
| <i>SvTEF</i> -Fw<br><i>SvTEF</i> -Rev         | ATCCAAGCAAGCCAATGTG<br>TGCCGTCAGTCTTCTCAACA      | Transcript Id 325682<br>JGI MycoCosm |
| <i>BsTEF</i> -Fw<br><i>BsTEF</i> -Rev         | CGCCGTACCGAAAGTCTG<br>GGCGAAACGACCAAGAGGA        | Transcript Id 29877<br>JGI MycoCosm  |
| <i>HvUbi</i> _Fw<br><i>HvUbi</i> _Rev         | ACCCTCGCCGACTACAACAT<br>CAGTAGTGGCGGTCTGAAGTG    | (Sakar et al., 2019)                 |
| <i>HvPR10</i> _Fw<br><i>HvPR10</i> _Rev       | GGAGGGCGACAAGGTAAGTG<br>CGTCCAGCCTCTCGTACTCT     | (Sakar et al., 2019)                 |
| <i>AtUbi</i> _Fw<br><i>AtUbi</i> _Rev         | CCAAGCCGAAGAAGATCAAG<br>ACTCCTTCTCAAACGCTGA      | AT3G62250                            |
| <i>At1g58420</i> _Fw<br><i>At1g58420</i> _Rev | TGGGAGCGTTACGGTTAAAGG<br>AGCCATTGTCATCCCAACACTCG | At1g58420                            |
